# Supplementary material
Source: PubMed Central journal article supplement (PMC4933962)
Supplement: NIHMS786491-supplement-Supporting_Information.pdf [file NIHMS786491-supplement-Supporting_Information.pdf]

## Supporting Information

| <b><i>TABLE OF CONTENTS</i></b>                                                                              | <b><i>Page</i></b> |
|--------------------------------------------------------------------------------------------------------------|--------------------|
| <b>1. Supporting Results</b>                                                                                 | S2                 |
| <b>2. Supporting Tables</b>                                                                                  |                    |
| Table S1. Biotransformation of L-Lys to L-ACL.                                                               | S3                 |
| Table S2. Enzymatic formation of A-503083 B ( <b>2</b> ) from <b>12</b> .                                    | S3                 |
| Table S3. Codon adaptation index for genes involved in <b>1</b> biosynthesis                                 | S4                 |
| <b>3. Supporting Figures</b>                                                                                 |                    |
| Figure S1. Analysis of the <b>1</b> biosynthetic gene cluster.                                               | S5                 |
| Figure S2. Development of a genetic system within the <b>2</b> -producing strain.                            | S6                 |
| Figure S3. Biotransformation with heterologous expression of <i>capV</i> and <i>capU</i> .                   | S7                 |
| Figure S4. Amino acid sequence alignment of select condensation domains of nonribosomal peptide synthetases. | S8                 |
| Figure S5. Recombinant CapW, CapV and CapU production.                                                       | S8                 |
| Figure S6. Nonenzymatic hydrolysis or lactamization of <b>14</b> .                                           | S9                 |
| Figure S7. Architecture of the NRPS subcluster.                                                              | S9                 |
| <b>4. Supporting References</b>                                                                              | S10                |

## 1. Supporting Results

*The development of a genetic system within the 1-producing strain.* We had previously prepared several high-, low-, or non-producing strains by random chemical mutagenesis, and expression analysis with these strains revealed a set of genes (*orfs* 7-28) within the 65-kb sequenced region that are only expressed in low- or high-producing strains at the onset of **1** production.<sup>[S1]</sup> Strains representing each production type were subjected to PCR analysis for amplification of every predicted *orf* within the sequenced locus to reveal that *orfs* 1-28 are intact in both producing and non-producing strains alike (Supporting Information, Figure S1). This includes the NRPS-encoding genes, *orf26* and *orf27*. In contrast *orfs* 29-38 were only present in the producing strains. The genomic DNA for each strain type was subsequently digested with *AseI* and subjected to pulse field gel electrophoresis, yielding two large DNA fragments (610 and 680-kb DNA) that each hybridized with a DIG-labelled *orf8* probe for all of the producing strains. In contrast while the 680-kb DNA fragment was observed, the 610-kb DNA fragment was not detected in representative nonproducing strains. In a similar manner, *orf37* was only present in the 610-kb DNA fragment of the producing strains. These results are consistent with the **1**-producing strain harboring multiple copies for several if not all of the required structural genes. The reason for complete loss of production in the non-producing strain is still unclear but is proposed to be a result of regulation malfunction.

## 2. Supporting Tables

**Table S1.** Biotransformation of L-Lys to L-ACL.

| Sample <sup>a</sup>  | [L-Lys]<br>( $\mu\text{g/mL}$ ) | [FMOC-ACL]<br>( $\mu\text{g/mL}$ ) | Sample               | [L-Lys]<br>( $\mu\text{g/mL}$ ) | [FMOC-ACL]<br>( $\mu\text{g/mL}$ ) |
|----------------------|---------------------------------|------------------------------------|----------------------|---------------------------------|------------------------------------|
| 500 mL LM<br>culture | 100                             | 2.7                                | 150 mL LM<br>culture | 100                             | 4.9                                |
|                      | 200                             | 5.5                                |                      | 200                             | 5.7                                |
|                      | 300                             | 2.4                                |                      | 300                             | 2.3                                |
|                      | 400                             | 2.0                                |                      | 400                             | 1.7                                |
|                      | 500                             | 2.0                                |                      | 500                             | 3.3                                |

<sup>a</sup>Abbreviations are LM, liquid media; FMOC-ACL, L- $\alpha$ -amino- $\epsilon$ -caprolactam derivatized with FMOC.

**Table S2.** Enzymatic formation of **2** from **12**.

| Variable               | Reaction <sup>a</sup> |                |                |    |    |   |    |    |    |    |
|------------------------|-----------------------|----------------|----------------|----|----|---|----|----|----|----|
|                        | 1 <sup>b</sup>        | 2 <sup>c</sup> | 3 <sup>d</sup> | 4  | 5  | 6 | 7  | 10 | 11 | 12 |
| MgCl <sub>2</sub>      | -                     | +              | -              | -  | +  | + | +  | +  | +  | -  |
| ATP                    | +                     | +              | -              | -  | +  | + | +  | +  | -  | +  |
| CoA                    | -                     | +              | -              | -  | +  | - | +  | +  | +  | +  |
| L-Lys                  | +                     | +              | -              | +  | +  | + | +  | +  | +  | +  |
| Svp                    | -                     | +              | -              | -  | +  | - | +  | +  | +  | +  |
| CapU                   | -                     | +              | -              | -  | +  | + | -  | +  | +  | +  |
| CapV                   | -                     | +              | -              | -  | -  | - | -  | -  | -  | -  |
| CapW                   | +                     | +              | +              | +  | +  | + | +  | -  | +  | +  |
| L-ACL                  | -                     | -              | +              | -  | -  | - | -  | -  | -  | -  |
| Yield (%) <sup>e</sup> | nd                    | 37             | 95             | nd | 32 | 5 | nd | nd | nd | nd |

<sup>a</sup>All reactions contained 50 mM Tris-HCl (pH = 7.5) and substrate **12** with (+) or without (-) indicated variable. Concentrations of each component are provided within the experimental procedures.

<sup>b</sup>Corresponds to Fig. S6B, trace *b*.

<sup>c</sup>Corresponds to Fig. S6B, trace *c*.

<sup>d</sup>Corresponds to Fig. S6B, trace *d*.

<sup>e</sup>Based on amount of **12** converted to product **2**; nd, not detected.

**Table S3.** Codon adaptation index for genes involved in **2** biosynthesis.

| Gene <sup>a</sup> | Length | CAI <sup>b</sup> | CAI <sup>c</sup> | %G+C <sup>d</sup> |
|-------------------|--------|------------------|------------------|-------------------|
| <i>capA</i>       | 924    | 0.521            | 0.464            | 77.6              |
| <i>capB</i>       | 1671   | 0.597            | 0.473            | 84.0              |
| <i>capC</i>       | 951    | 0.646            | 0.491            | 88.3              |
| <i>capD</i>       | 975    | 0.779            | 0.650            | 92.9              |
| <i>capE</i>       | 1404   | 0.690            | 0.598            | 90.4              |
| <i>capF</i>       | 951    | 0.592            | 0.469            | 85.2              |
| <i>orf15</i>      | 1200   | 0.697            | 0.533            | 88.3              |
| <i>capG</i>       | 1158   | 0.717            | 0.594            | 89.9              |
| <i>capH</i>       | 1239   | 0.654            | 0.548            | 87.4              |
| <i>capI</i>       | 264    | 0.529            | 0.478            | 77.3              |
| <i>capJ</i>       | 2286   | 0.730            | 0.601            | 91.2              |
| <i>capK</i>       | 738    | 0.595            | 0.476            | 82.9              |
| <i>capL</i>       | 507    | 0.644            | 0.508            | 85.8              |
| <i>capM</i>       | 870    | 0.709            | 0.549            | 89.7              |
| <i>capN</i>       | 2034   | 0.649            | 0.502            | 87.9              |
| <i>capO</i>       | 1839   | 0.717            | 0.524            | 91.0              |
| <i>capP</i>       | 915    | 0.503            | 0.411            | 79.0              |
| <i>capS</i>       | 780    | 0.559            | 0.442            | 81.2              |
| <i>capT</i>       | 1890   | 0.655            | 0.535            | 87.0              |
| <i>orf16</i>      | 402    | 0.487            | 0.336            | 79.1              |
| <i>capU</i>       | 1410   | 0.495            | 0.337            | 77.3              |
| <i>capV</i>       | 3312   | 0.401            | 0.414            | 69.1              |
| <i>capW</i>       | 1209   | 0.617            | 0.544            | 86.4              |
| <i>orf17</i>      | 546    | 0.635            | 0.527            | 85.2              |

<sup>a</sup>Genes required for **12** biosynthesis are highlighted in red. The *capP* gene encodes an ATP:2 phosphotransferase that confers self-resistance. The gene *capT* encodes a putative C-methyltransferase that modifies the L-ACL following incorporation into **12**.

<sup>b</sup>Referenced against the codon usage table for *Streptomyces griseus* sups. griseus.

<sup>c</sup>Referenced against the glucokinase gene from *Streptomyces griseus* sups. griseus (Genbank accession no. AP009493).

<sup>d</sup>G+C content at the third position of the codon.

### 3. Supporting Figures

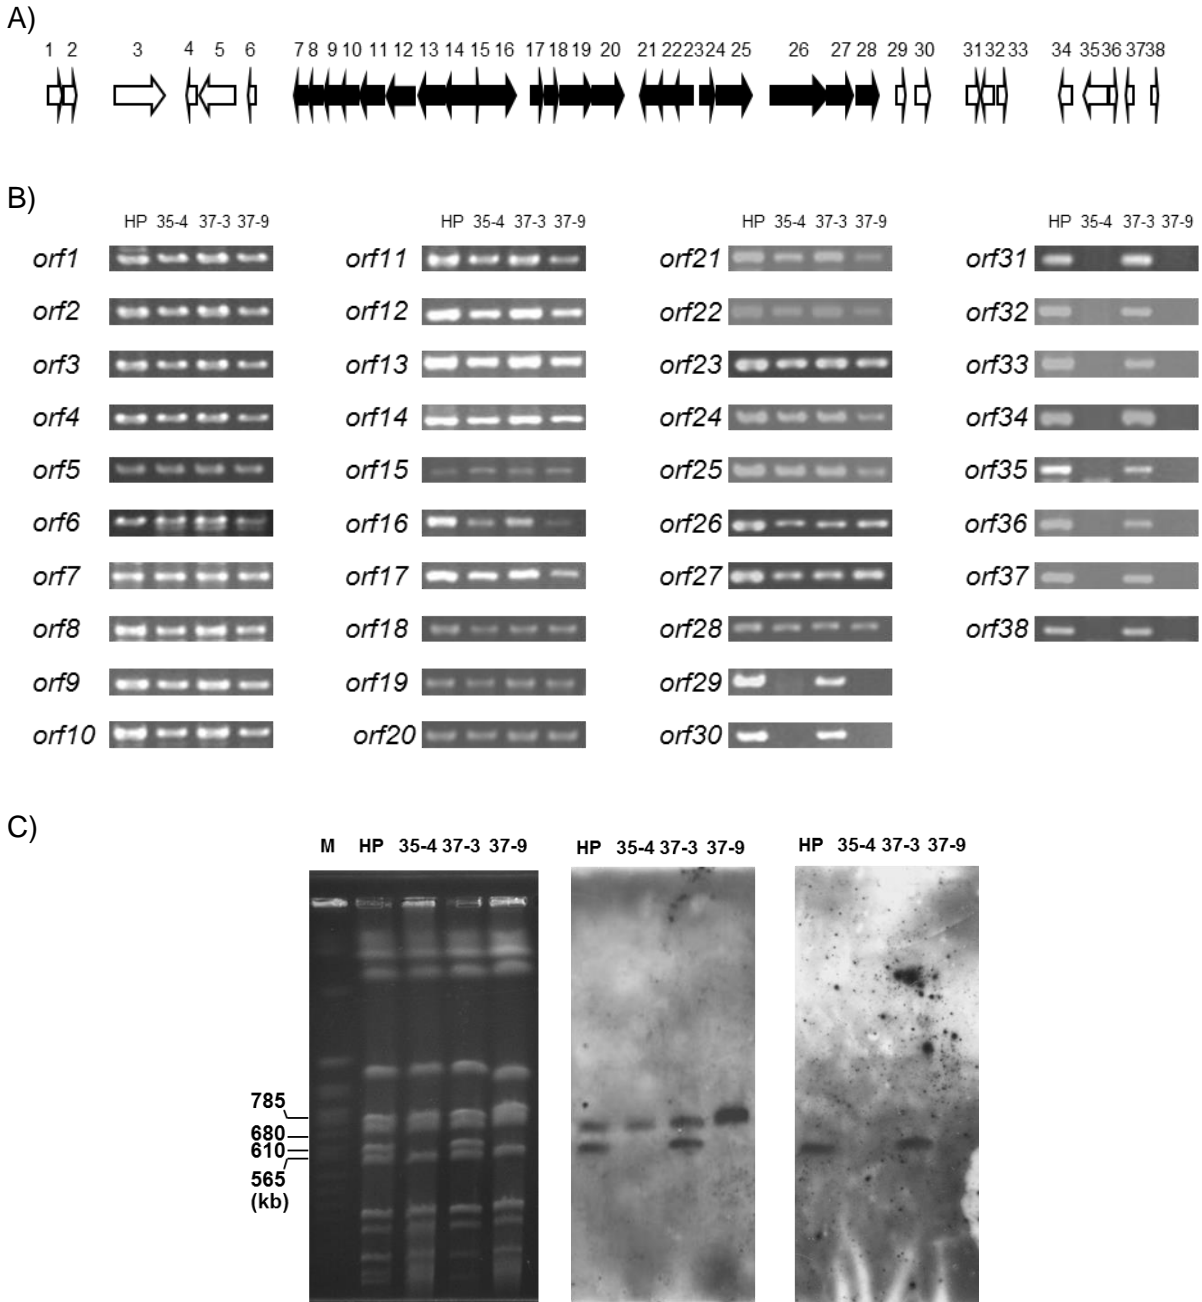

**Figure S1.** Analysis of the **1** biosynthetic gene cluster. A) Genetic architecture of the open reading frames (*orfs*) from the sequenced region encompassing 65-kb DNA. Filled *orfs* (7-28) are highly expressed during the onset of **1** production and hence are probably required for biosynthesis. B) PCR amplification of each of the 38 *orfs* using template DNA from a high-producing strain (HP), a low-producing mutant strain (37-3), and two non-producing strains (35-4 and 37-9). C) Pulse-field gel electrophoresis analysis of total genomic DNA isolated from the indicated strains and subjected to *AseI* digestion. Lane M (marker) is *Saccharomyces cerevisiae* chromosomes (Bio Rad), and Southern blot analysis was performed using *orf8* as a probe (middle panel) or *orf37* (right panel).

A)

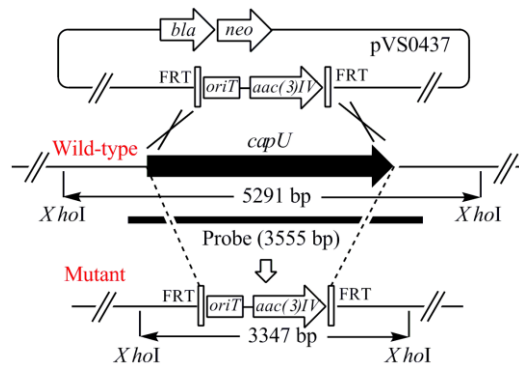

B)

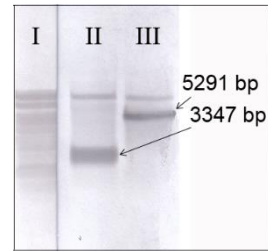

**Figure S2.** Development of a genetic system within the producing strain of **2**. A) Strategy to prepare an in-frame deletion of *capU*. B) Southern blot analysis of genomic DNA isolated from the  $\Delta capU$  mutant strain (II) or wild-type strain (III) and digested with *XhoI*. Lane I, DNA marker.

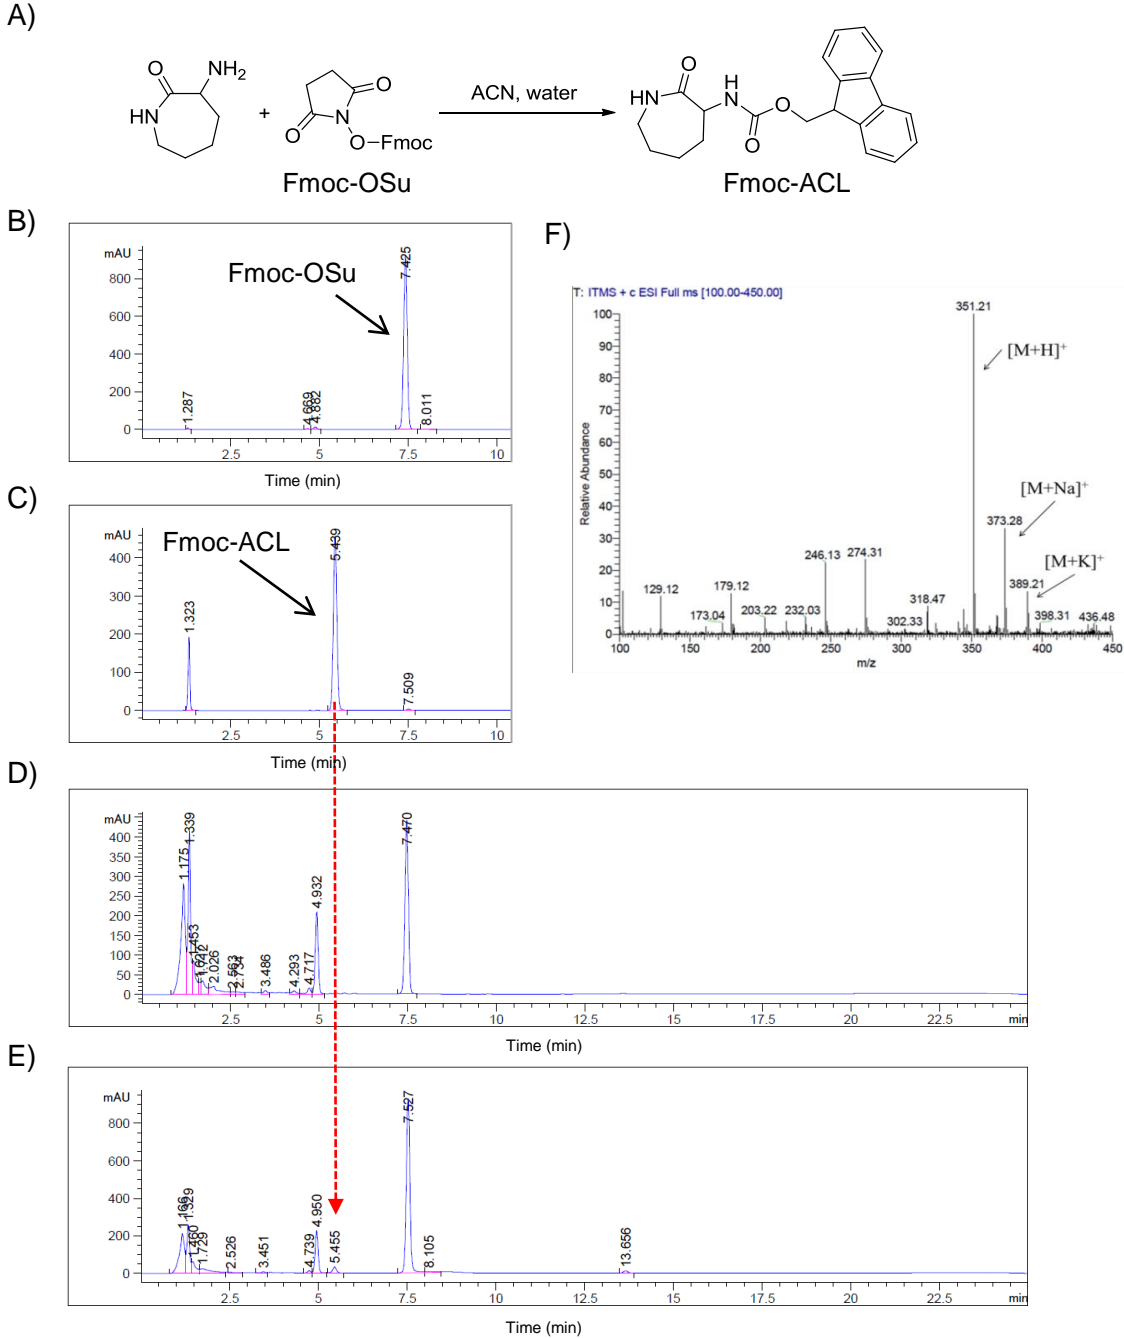

**Figure S3.** Biotransformation of L-Lys upon heterologous expression of *capV* and *capU*. (A) Modification of ACL with Fmoc. Fmoc-OSu, Fmoc *N*-hydroxysuccinimide ester. HPLC analysis of Fmoc-ACL production including (B) Fmoc-OSu control, (C) L-ACL standard modified by Fmoc-OSu, (D) Fmoc-OSu modified extract from *S. lividans* TK64 with empty vector (pUWL201pw), (E) Fmoc-OSu modified extract from *S. lividans* TK64 pUWL201pw-*capUV* revealing a peak with retention time 5.455 min that co-elutes with Fmoc-OSu modified L-ACL. (F) The observed mass spectrum for the product at retention time = 5.455 min (expected  $m/z = 350.16$  for  $C_{21}H_{22}N_2O_3$ ).

```

1      10     20     30     40     50     60
TycC6  KQAYYPVSSAQRMYIILDQFEGVGI SYNMPSTMLIEGKLERTRVEAAAFQRLIARHESLRTSF
SrfA-C VQDMYYLSPMQEGMLFHAILNPGQSFYLEQITMKVIGSLNIKCLEESMNVIIMDRYDVFRITVF
VibH   MLLAQKPFWRHLAYPHINLDTVAHSLRLTGLPLDTLLLEPALHLTVSEIDLFRAPF
CapV   ILEVAPAHPHSRCAGIHQLFVLRGVPVEPARLRAAWRNLQYRHDALRTIF
CapU   VPPGQLRWSAQQEQMWFREQTGGDPSEHNLVYRFL LHGQVDDRLVAALPATVSRQSVLSAPQ

70     80     90     100    110    120
TycC6  AVVNGEP-----VQNIH-EDVVPFALAYSEVTEEEARELVS-SLVQPFDDLEVAPLIRVSLLK
SrfA-C IHEKVKRPVQVVLKRPQHIEEIDLTLTGLSEQTAKINEYKEQDKIRGFDLTRDIPMRAAIFK
VibH   SAQGELY-----WHPPSPPIDYQDLSIHLEAEP LAWRIEQDLQRSSTLIDAPITSHQVYR
CapV   SEQGSQW-----RQRVTRMTSELVIRGAAIDERTMRETGVRHRVEGFDLAGGALARAEVLV
CapU   GRHATVP-----RADFH---VRTVDATG SAPDSVLSVLESLRTESAHPLEENQLLARATLVH

130    140    150    160    170    180
TycC6  IGEDRYVLFDTMHHISIDGVSSGILLAEWVQLYQGDVL-PELRIQYKDFAVWQDEFSSQSAAFH
SrfA-C KAEESFEVWWSYHHIILDFWCFGI VVQDLFKVYNALREKPYSLPPVKPYKDYIKWLEKQDRQ
VibH   LSHSEHLIYTRAHHIVLDGFGYGMMLFEQRLSQHYQSLLS---GQTPTAAPKPYQSYLEEEAAIY
CapV   GREATHILVLSVHHSVVDGYSGLVLDLDCQAYNDPGD-APLPTQGEFAQQQ----SARRIV
CapU   CSEDRRLLVVTVHQAARDLRVVAIFMREVAAYQSTTAGRDLELSYSDFSHWQYEMLSRRGDA

190    200    210    220    230    240    250
TycC6  KQEAYWLQTFADDIPVNLNPTDFTRPSTQSFAGDQCTIGAGKALT---EGLHQLAQATGTTLY
SrfA-C ASLRYWREYLEGFEGQTTFAEQ-RKKQKDGYPEKLELFSPEAET---KAFTELAKSQHTTLS
VibH   TSHRYWQDRQFWQGYLREAPDLTSLATYDPLSHAVSLSTLNSQLNHLLKLANANQIGWFL
CapV   RAKEAALTIRSRYPKALDSPAD-TRPRPHVYDLGGIMLRWIGIVES---GRLAARAGEEGLTLY
CapU   LPKWWSANQYSGVSLPPDRPPDRGDDGPLRGLTSARICADVASSGVTSALAEVGRAVGVVVP

260    270    280    290    300    310    313
TycC6  MVLLAAAYN-VLLAKYAGQEDIIVGTPITGESHAD--LEPIVGMFVNTLAMRNKPKQR
SrfA-C TALQAVWS-VLISRYQQSGDLAFGTVVSGRPAEIKGVEHMGVLFINVVPPRVKLS
VibH   DALVALCALYLES--AEPDAPWLLPFFMNRWGSV--AANVPLMNVSLPLRLRFAQQTS
CapV   MVLLAAAYR.SALEGKGLLSPDAPVWSPMSGRVSSC--FSRSVGLFMMILVVPVFGSIARAPEGE
CapU   TVVFGLLA-LLVSRWNQDEVTIGWTGDRPGEQ--FGDVIIGPFSNVLVPSISIDPAAEVP

```

**Figure S4.** Amino acid sequence alignment of select condensation domains of nonribosomal peptide synthetases. The alignment includes TycC6 involved in tyrocidine biosynthesis from *Brevibacillus brevis* (amino acids 5206-5496 of accession no. O30409); SrfA-C involved in surfactin biosynthesis from *Bacillus subtilis* (amino acids 9-309 of accession no. CAA51224); VibH involved in vibriobactin biosynthesis from *Vibrio cholera* (amino acids 1-290 of accession no. AAD48879); CapV (amino acids 1-281 of accession no. BAJ19067); and CapU (amino acids 55-357 of accession no. BAJ19067).

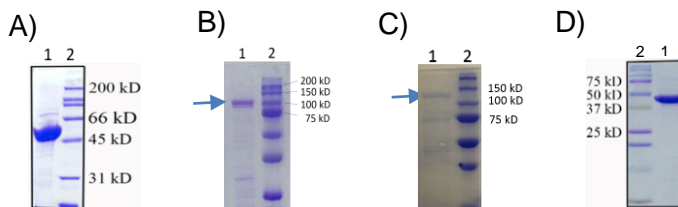

**Figure S5.** Recombinant CapV, CapU, CapU\_AT, and CapW. (A) SDS-PAGE analysis of partially purified His<sub>6</sub>-CapV (lane 1, expected MW of 48.2 kD); (B) SDS-PAGE analysis of partially purified His<sub>6</sub>-CapU (lane 1, expected MW of 114.4 kD) expressed from pET30Xa in *E. coli* BL21(DE3). In both cases the engineered N-terminal His<sub>6</sub>-tag contributes ~5 kD to the predicted native molecular weight. (C) SDS-PAGE analysis of partially purified MBP-CapU\_AT (lane 1, expected MW of 125.1 kD) expressed from Pdb.His.MBP in *E. coli* BL21(DE3). The engineered N-terminal MBP-tag contributes ~42.5 kD to the predicted native molecular weight. (D) SDS-PAGE analysis of partially purified His<sub>6</sub>-CapW (lane 1) expressed from pXY200 in *S. lividans* TK24 (expected MW of ~44 kD; the engineered N-terminal His<sub>6</sub>-tag contributes ~1 kD to the predicted native molecular weight).



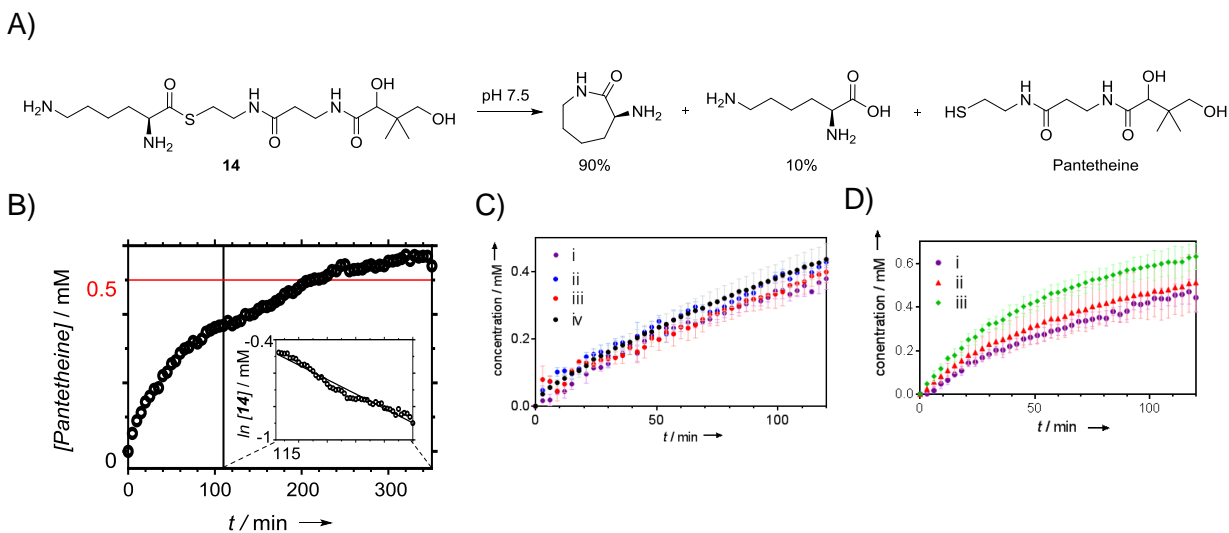

**Figure S6.** Nonenzymatic lactamization/hydrolysis of **14**. (A) Structure of the surrogate substrate **14** and the nonenzymatic formation of L-ACL, L-Lys, and pantetheine. (B) Time dependence of the nonenzymatic reaction of **14**. The inset depicts a secondary plot for later time points during the reaction ( $[14] < 0.65$  mM), which displays a linear relationship that is consistent with a pseudo-first order reaction. (C) Nonenzymatic reaction of **14** detected by sulfhydryl formation including i) control reaction (no enzyme); ii) CapU; iii) CapU and N-terminal His-tagged CapV; and iv) CapU and C-terminal His-tagged CapV. (D) Nonenzymatic reaction of **14** detected by sulfhydryl formation including i) control (no CapW); ii) CapW; and iii) CapW and **12**.

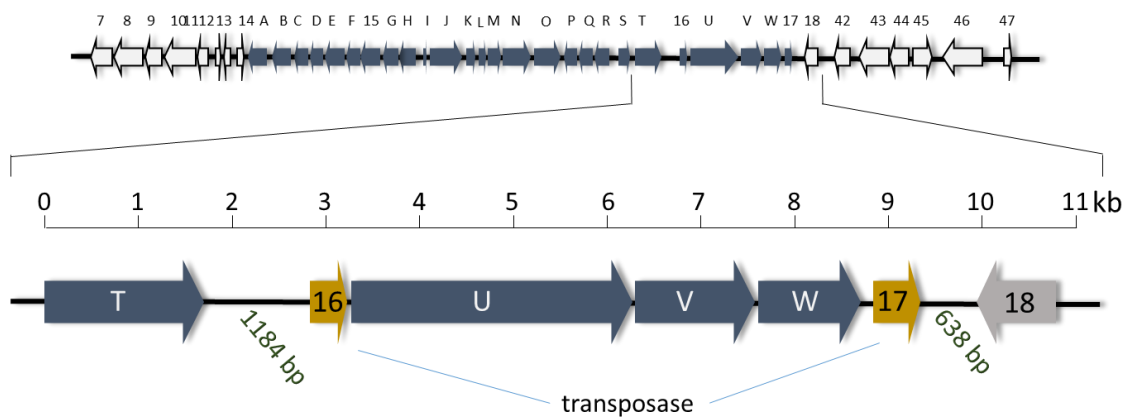

**Figure S7.** Organization of the genetic locus encompassing the **2** biosynthetic gene cluster. A close-up view of the region between *capT* and *orf18* demonstrating that the amide bond forming catalysts (*capU* and *capW*) are flanked by two *orfs* encoding putative transposases and long intergenic regions.

#### 4. Supporting References

[S1] M. Funabashi, K. Nonaka, C. Yada, T. Suzuki, T. Suzuki, Y. Ogawa, M. Hosobuchi, Y. Fujita, M. Kizuka, T. Shibata, *Actinomycetologica* **2009**, *23*, 46-50.
